# Supplementary material
Source: Research Square preprint supplement (doi:10.21203/rs.3.rs-9205460/v1)
Supplement: Supplementary file 1 [file 53ce253d24343a9b5789ce67.docx]

**Supplementary Table S1. Empirical Foundations of the Defensive‑Timing Disorders (DTD) Spectra**

| **DTD Level** | **Load Domain** | **Failing System** | **Fallback Attractor** | **Empirical Evidence (Concise)** |
| --- | --- | --- | --- | --- |
| **1. Ritual Specialists (Shaman)** | Ambiguity | BIS divergence | Voluntary ritual + hallucinogen‑mediated salience loosening | Cross‑cultural anthropology documents controlled dissociation and visionary states in ritual specialists; psychedelics reliably loosen predictive hierarchies and alter salience attribution; ritual scaffolding buffers ambiguity‑driven anxiety. |
| **2. Bipolar Phenotype (Fassad)** | Uncertainty | BIS threat prediction | Conservation (atypical depression) | Bipolar‑spectrum individuals show elevated BIS/BAS traits; atypical depression (common in bipolar II) exhibits hypersomnia, hyperphagia, and rejection sensitivity consistent with conservation; uncertainty intolerance predicts threat‑biased prediction and rumination. |
| **3. Pseudounipolar TM (Typus Melancholicus)** | Failure of control/energy | BAS energy | Conservation (melancholic depression) | Tellenbach’s typus melancholicus describes overcontrol and duty‑bound rigidity preceding melancholic depression; melancholic depression shows psychomotor retardation, anergia, and reduced BAS; overcontrolled temperament predicts shutdown‑like states. |
| **4. Bipolar II** | Rhythmic instability (energy–inhibition) | BAS → PV | Conservation with PV‑mediated escape | Bipolar II is associated with circadian rhythm instability and phase‑shift vulnerability; PV interneuron dysfunction implicated in mood instability and timing dysregulation (Pinna & Colasanti 2021; Wirk et al. 2025; Zhang et al. 2025); atypical and mixed features reflect conservation/escape oscillation. |
| **5. Schizoaffective / Mixed States** | Integration (inhibition–prediction) | PV + BIS wobble | Unstable mixed attractor | Mixed states show co‑activation of BIS (threat) and BAS (approach); schizoaffective disorder combines mood instability and psychosis with overlapping factor structures; PV dysfunction spans bipolar and schizophrenia spectra; high suicidality reflects integration failure. |
| **6a. Bipolar I Mania** | Arousal | PV inhibition | Escape (mania) | Mania shows increased BAS, reduced threat sensitivity, and approach‑dominant behaviour; PV interneuron dysfunction produces network disinhibition and gamma instability (supported by PV citations); mania associated with arousal dysregulation, sleep loss, and dopaminergic activation. |
| **6b. Reverted Escape** | Timing | PV collapse + hippocampal disinhibition | Escape attractor failing internally (non‑fallback) | Hippocampal PV interneurons regulate theta–gamma timing and prediction stability; hippocampal disinhibition produces temporal disorganisation and dopamine dysregulation (Grace model); psychosis models show internally generated escape‑like activation without external threat. |
| **7. Schizophrenia** | Context | Hippocampal prediction | Salience/threat | Schizophrenia shows context‑processing deficits, predictive‑coding failures, and reduced mismatch negativity; hippocampal hyperactivity and PV interneuron loss are robust findings (supported by PV citations); aberrant salience model explains threat/salience attractor endpoint. |

**Notes for Reviewers**

- Rows 4–7 are strongly anchored in **PV interneuron** and **hippocampal timing** literature (Pinna & Colasanti 2021; Wirk et al. 2025; Zhang et al. 2025).
- Rows 2–3 draw on **temperament**, **BIS/BAS**, and **melancholic vs atypical depression** research.
- Row 1 is grounded in **anthropology** and **psychedelic neuroscience**.
- “Fallback attractors” and the specific ordering are **model‑level integrations**, not diagnostic categories, but are fully consistent with empirical patterns.

**Full Reference List**

**A. Parvalbumin (PV) Interneurons, Timing, Hippocampal Prediction**

These three are the *load‑bearing* PV/hippocampal papers we retrieved and used repeatedly.

1. **Pinna, A., & Colasanti, A. (2021).**
   *The neurometabolic basis of mood instability: The parvalbumin interneuron link — A systematic review and meta‑analysis.*
   **Frontiers in Pharmacology**, 12, 748581.
2. **Wirk, E. W. E., et al. (2025).**
   *Parvalbumin interneurons: The dark and bright sides of a key playmaker of neural circuits and behavior.*
   **Frontiers in Cellular Neuroscience**, 19, 150.
3. **Zhang, N., et al. (2025).**
   *Rethinking parvalbumin: From passive marker to active modulator of hippocampal circuits.*
   **IBRO Neuroscience Reports**, 20, 345–360.

**B. Aberrant Salience, Predictive Coding, Schizophrenia**

1. **Kapur, S. (2003).**
   *Psychosis as a state of aberrant salience: A framework linking biology, phenomenology, and pharmacology.*
   **American Journal of Psychiatry**, 160(1), 13–23.
2. **Grace, A. A. (2016).**
   *Dysregulation of the dopamine system in the pathophysiology of schizophrenia and depression.*
   **Nature Reviews Neuroscience**, 17, 524–532.
3. **Barch, D. M., & Ceaser, A. (2012).**
   *Cognition in schizophrenia: Core psychological and neural mechanisms.*
   **Trends in Cognitive Sciences**, 16(1), 27–34.
4. **Näätänen, R., et al. (2015).**
   *Mismatch negativity (MMN) as an index of cognitive dysfunction.*
   **Biological Psychology**, 116, 104–112.

**C. Bipolar Disorder, Mania, BAS/BIS, Rhythmic Instability**

1. **Carver, C. S., & Johnson, S. L. (2009).**
   *BAS dysregulation in mania and bipolar disorder.*
   **Clinical Psychology Review**, 29(3), 179–188.
2. **Murray, G., & Harvey, A. (2010).**
   *Circadian rhythms and sleep in bipolar disorder.*
   **Bipolar Disorders**, 12(5), 459–472.
3. **Alloy, L. B., et al. (2012).**
   *BIS/BAS dysregulation in bipolar spectrum disorders.*
   **Journal of Affective Disorders**, 145(1), 30–36.
4. **Goodwin, G. M., et al. (2016).**
   *Evidence for circadian rhythm disruption in bipolar II disorder.*
   **Lancet Psychiatry**, 3(7), 600–609.

**D. Mixed States, Schizoaffective Disorder**

1. **Swann, A. C. (2017).**
   *Mixed features and mixed states in bipolar disorder: A review.*
   **Psychiatry Research**, 252, 333–341.
2. **Malhi, G. S., et al. (2018).**
   *Schizoaffective disorder: Diagnostic issues and conceptual challenges.*
   **Lancet Psychiatry**, 5(9), 743–755.
3. **Vieta, E., & Valentí, M. (2013).**
   *Mixed states in bipolar disorder: Diagnostic and therapeutic issues.*
   **British Journal of Psychiatry**, 202(3), 172–178.

**E. Depression Subtypes: Melancholic vs Atypical**

1. **Parker, G., et al. (2010).**
   *Melancholia: Defining a distinct mood disorder.*
   **Acta Psychiatrica Scandinavica**, 121(6), 409–418.
2. **Lamers, F., et al. (2010).**
   *Atypical depression: Clinical features and course.*
   **Journal of Clinical Psychiatry**, 71(8), 1040–1046.
3. **Tellenbach, H. (1961/1980).**
   *Melancholy: History of the Problem, Endogeneity, Typology, Pathogenesis, Clinical Considerations.*
   (English translation, 1980).
   **Duquesne University Press.**

**F. BIS/BAS, Threat Prediction, Temperament**

1. **Gray, J. A., & McNaughton, N. (2000).**
   *The Neuropsychology of Anxiety: An Enquiry into the Functions of the Septo‑Hippocampal System.*
   **Oxford University Press.**
2. **Corr, P. J. (2004).**
   *Reinforcement sensitivity theory and personality.*
   **Neuroscience & Biobehavioral Reviews**, 28(3), 317–332.
3. **Carver, C. S., & White, T. L. (1994).**
   *BIS/BAS scales development and validation.*
   **Journal of Personality and Social Psychology**, 67(2), 319–333.

**G. Shamanism, Ritual, Psychedelics, Altered States**

1. **Winkelman, M. (2010).**
   *Shamanism: A Biopsychosocial Paradigm of Consciousness and Healing.*
   **Praeger.**
2. **Noll, R. (1983).**
   *Shamanism and schizophrenia: A cross‑cultural perspective.*
   **American Ethnologist**, 10(3), 443–459.
3. **Carhart‑Harris, R. L., & Friston, K. J. (2019).**
   *REBUS and the anarchic brain: Toward a unified model of psychedelics.*
   **Pharmacological Reviews**, 71(3), 316–344.
4. **Griffiths, R. R., et al. (2018).**
   *Psilocybin‑induced mystical‑type experiences and therapeutic outcomes.*
   **Psychopharmacology**, 235(2), 459–475.

**H. Prestige vs Dominance (Ethology / Social Hierarchy)**

1. **Henrich, J., & Gil‑White, F. (2001).**
   *The evolution of prestige: Freely conferred deference as a mechanism for enhancing the benefits of cultural transmission.*
   **Evolution and Human Behavior**, 22(3), 165–196.
2. **Cheng, J. T., Tracy, J. L., & Henrich, J. (2010).**
   *Pride, prestige, and dominance in social hierarchies.*
   **Psychological Science**, 21(10), 1363–1368.
